# Supplementary material
Source: PubMed Central journal article supplement (PMC9308721)
Supplement: NIHMS1811773-supplement-6.pdf [file NIHMS1811773-supplement-6.pdf]

Supplementary Figure 1: AAV capsid library outcome post round-2 *in vivo* selection

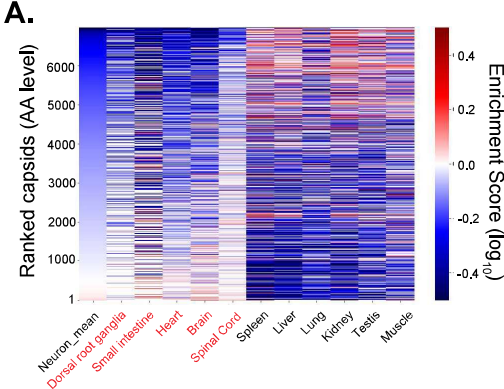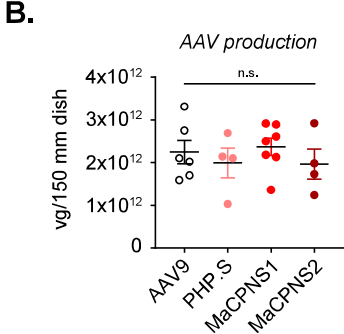

**Supplementary Figure 1: AAV capsid library outcome post round-2 *in vivo* selection. Related to Figure 1.**

**A.** Heatmap of 6300 capsid variants which showed a bias towards one or more of the neuronal tissues. Heatmap shows mean enrichment by Cre-dependent recovery across tissues of interest (red text) and Cre-independent recovery across off-targets (black text) after two rounds of selection. Cre lines are grouped by organs. The y-axis represents capsids unique at the amino acid (AA) level, ranked by 'neuron mean', which is the mean of the enrichment of all targets of interest. **B.** AAV vector yields from an established laboratory protocol (see Methods). One-way analysis of variance (ANOVA) non-parametric Kruskal-Wallis test (approximate  $P=0.6407$ , n.s.), and follow-up multiple comparisons with uncorrected Dunn's test are reported (individual  $P > 0.05$ , n.s.;  $n \geq 4$  per group, each data point is the mean of 3 technical replicates, mean  $\pm$  s.e.m is plotted).

Supplementary Figure 2: Characterization of AAV variants across different organs in mice following systemic delivery.

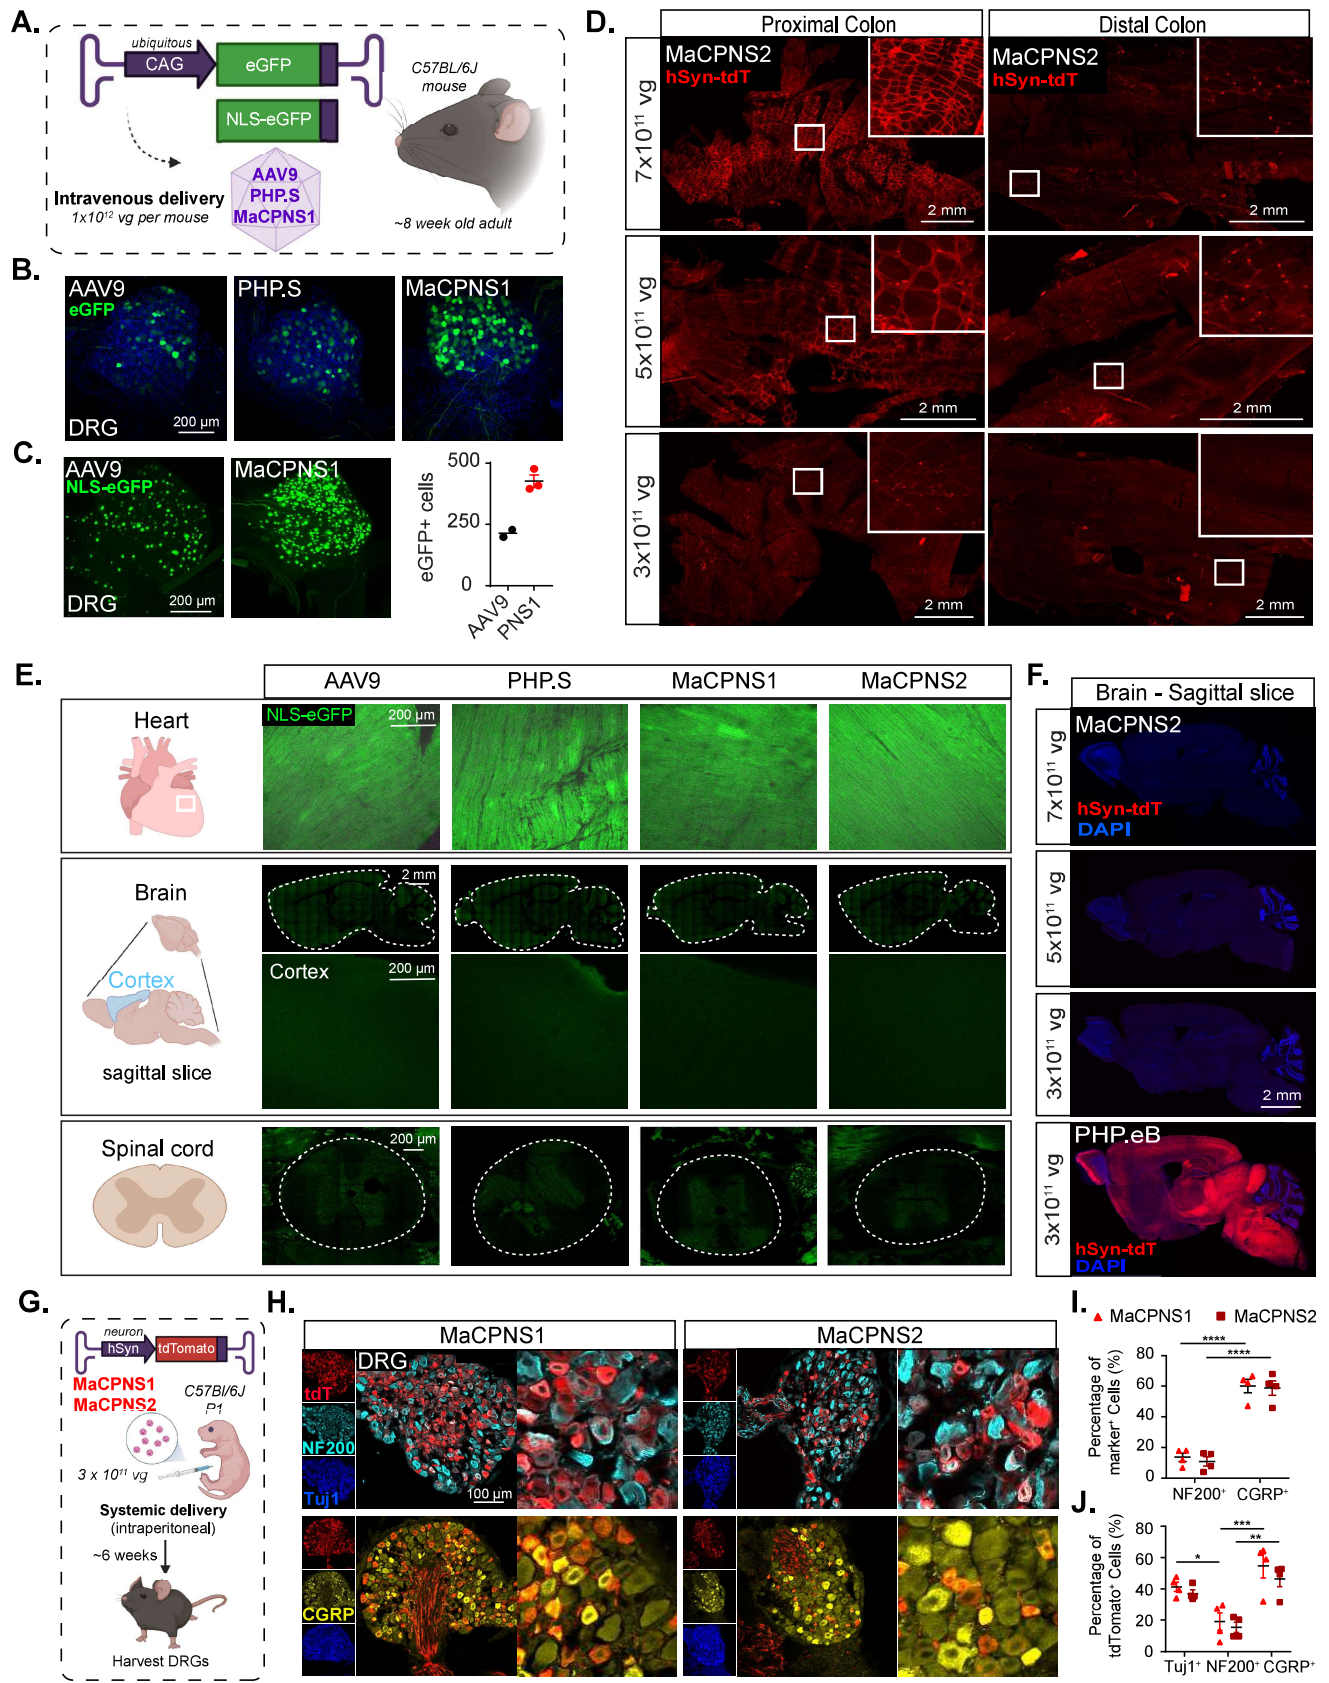

**Supplementary Figure 2: Characterization of AAV variants across different organs in mice following systemic delivery. Related to Figure 2.**

**A.** Illustration of IV administration of AAV9/PHP.S/MaCPNS1 capsid packaged with either ssAAV:CAG-eGFP or ssAAV:CAG-NLS-eGFP genome in mice (~8 weeks old, C57BL/6J males) at  $1 \times 10^{12}$  vg dose/mouse. **B.** Vector (AAV9/PHP.S/MaCPNS1)-mediated expression of eGFP (green) in DRG after 3 weeks of expression *in vivo* (n=3 per group). **C.** Vector-mediated expression of NLS-eGFP (green) in DRG after 3 weeks of expression, with imaging parameters matched across samples. Quantification of eGFP+ cells in DRG is shown at right (n=2-3 per group, mean  $\pm$  s.e.m is plotted for n>2, mean is plotted for n=2). **D.** MaCPNS2 vector-mediated expression of tdTomato (red) from ssAAV:hSyn-tdTomato in the proximal and distal segments of the colon at three different IV doses per mouse:  $7 \times 10^{11}$  vg,  $5 \times 10^{11}$  vg,  $3 \times 10^{11}$  vg (3 weeks of expression, n=3 per group, white boxes show zoomed-in views of selected areas). **E.** Vector (AAV9, PHP.S, MaCPNS1 and MaCPNS2)-mediated expression of NLS-eGFP (green) in organs after 3 weeks of expression. Top panels show expression in heart. Middle panels show expression in the brain with zoomed-in views of the cortex. Bottom panels show expression in the spinal cord. **F.** MaCPNS2 vector-mediated expression of tdTomato (red) from ssAAV:hSyn-tdTomato in the brain at three different IV doses per mouse:  $7 \times 10^{11}$  vg,  $5 \times 10^{11}$  vg,  $3 \times 10^{11}$  vg (3 weeks of expression, n=3 per group). Bottom panel shows PHP.eB vector-mediated expression of tdTomato (red) using ssAAV:hSyn-tdTomato in the brain at an IV dose per mouse of  $3 \times 10^{11}$  vg (3 weeks of expression, n=3 per group). The tissues were co-stained with the nuclear stain DAPI (blue). Imaging parameters in **B-F** were matched across samples to the respective control in the experiment or the area. **G.** Illustration of intraperitoneal administration of MaCPNS1 vector packaged with ssAAV:hSyn-tdTomato in a C57BL/6J mouse model (postnatal stage 1 (P1), males,  $3 \times 10^{11}$  vg IV dose/mouse). After six weeks of expression, the DRG were harvested. **H.** Representative images of DRG sections showing MaCPNS1 vector-mediated tdTomato (red) expression. The tissues were co-stained with  $\alpha$ NF200 (cyan),  $\alpha$ Tuj1 (blue) and  $\alpha$ CGRP (yellow) markers. **I.** Quantification of the proportion of  $\alpha$ NF200 and  $\alpha$ CGRP marker+ cells that overlap with the AAV-mediated tdTomato-expressing cells in DRG, and **J.** proportion of AAV-mediated tdTomato-expressing cells that overlap with  $\alpha$ Tuj1,  $\alpha$ NF200 and  $\alpha$ CGRP markers in DRG (n=4 per group, unpaired t-test. Mean $\pm$  sem are shown.)

Supplementary Figure 3: Novel variants transduce peripheral ganglia and CNS in rats.

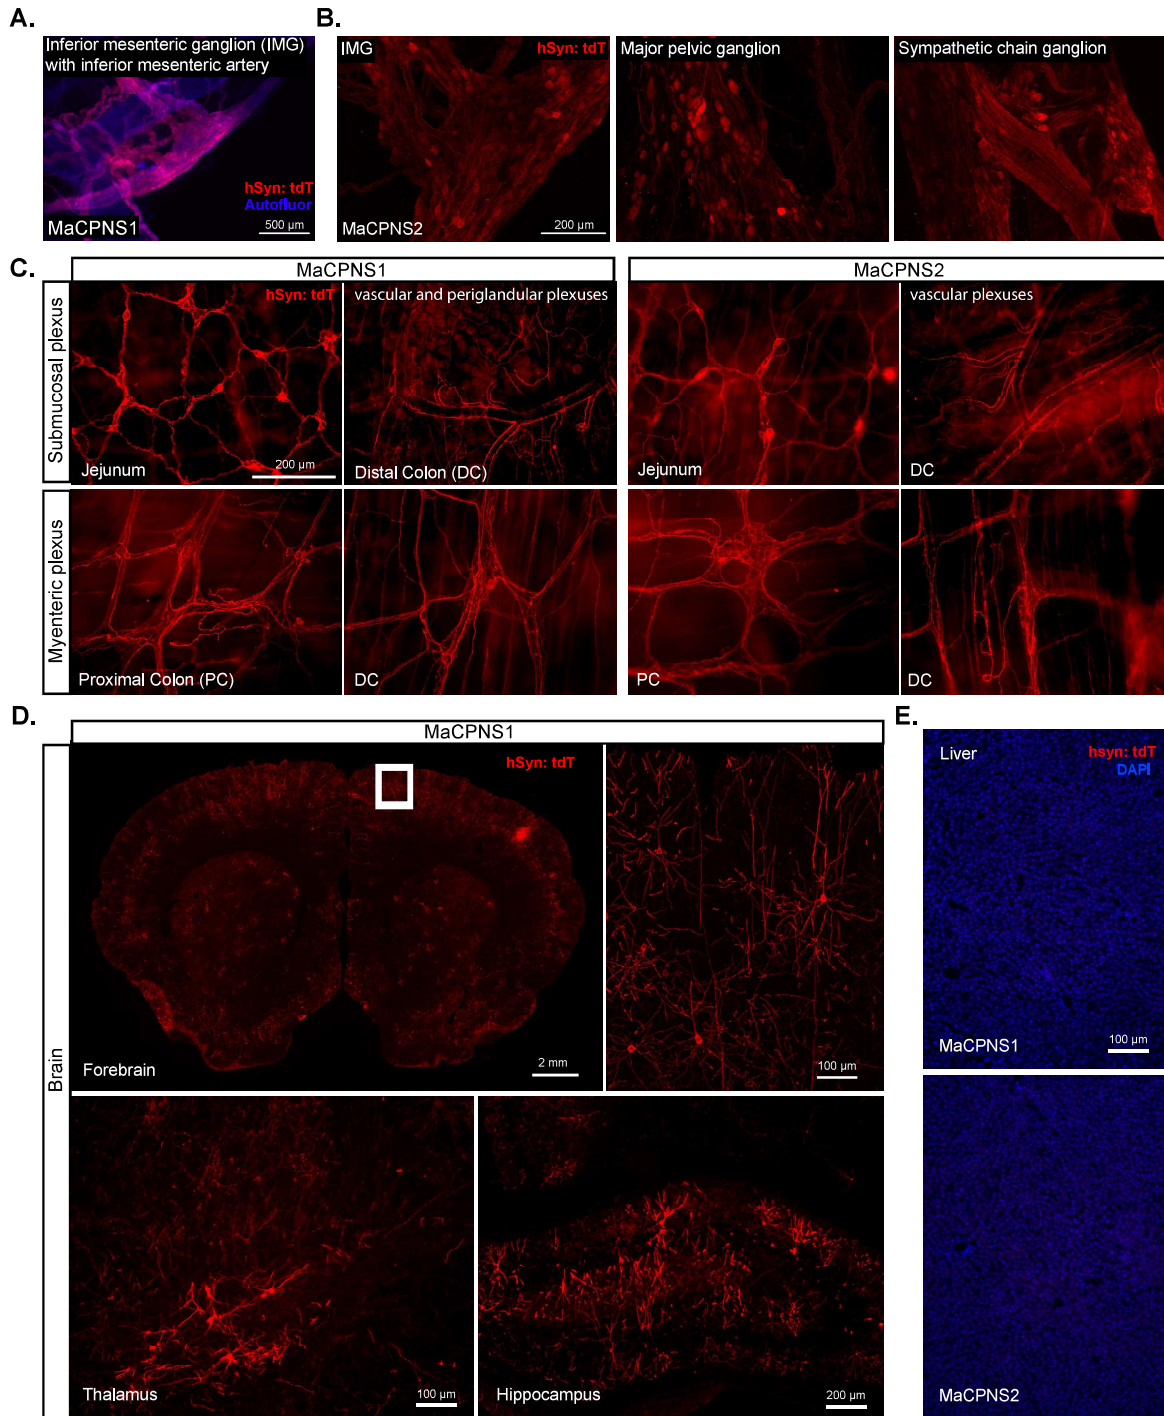

**Supplementary Figure 3. Novel variants transduce peripheral ganglia and CNS in rats. Related to Figure 3.**

AAV capsids (MaCPNS1 and MaCPNS2 packaged with ssAAV:hSyn-tdTomato genome) were intravenously administered in a rat model (young adults, Sprague Dawley, male,  $2 \times 10^{13}$  vg/kg per rat). The tissues were stained with  $\alpha$ DsRed (red) antibody against tdTomato. **A.** Representative image of MaCPNS1 vector-mediated tdTomato (red) expression in inferior mesenteric ganglion with inferior mesenteric artery (scale bar: 500  $\mu$ m). **B.** Representative images of MaCPNS2 vector-mediated tdTomato (red) expression in major pelvic ganglia (left), sympathetic chain ganglia (middle) and inferior mesenteric ganglia (right) in adult rats after 3 weeks of expression ( $n \geq 2$  per group, scale bar: 200  $\mu$ m). **C.** Representative images of MaCPNS1 (left) and MaCPNS2 (right) vector-mediated tdTomato expression in the jejunum and distal colon at the submucosal plexus layer (top) and proximal colon and distal colon at the myenteric plexus layer (bottom). (scale bar: 200  $\mu$ m). **D.** Representative images of MaCPNS1 vector-mediated tdTomato expression in the brain including forebrain (top left, scale bar: 2mm) with zoomed-in view of the cortex (white box, scale bar: 100  $\mu$ m), thalamus (bottom left, scale bar: 100  $\mu$ m) and hippocampus (bottom right, scale bar: 200  $\mu$ m). **E.** Representative images of MaCPNS1 and MaCPNS2 vector-mediated tdTomato expression in the liver. The tissues were co-stained with DAPI (blue) (scale bar: 100  $\mu$ m).

Supplementary Figure 4: Cell-type profiles of engineered AAVs in marmoset brain

A.

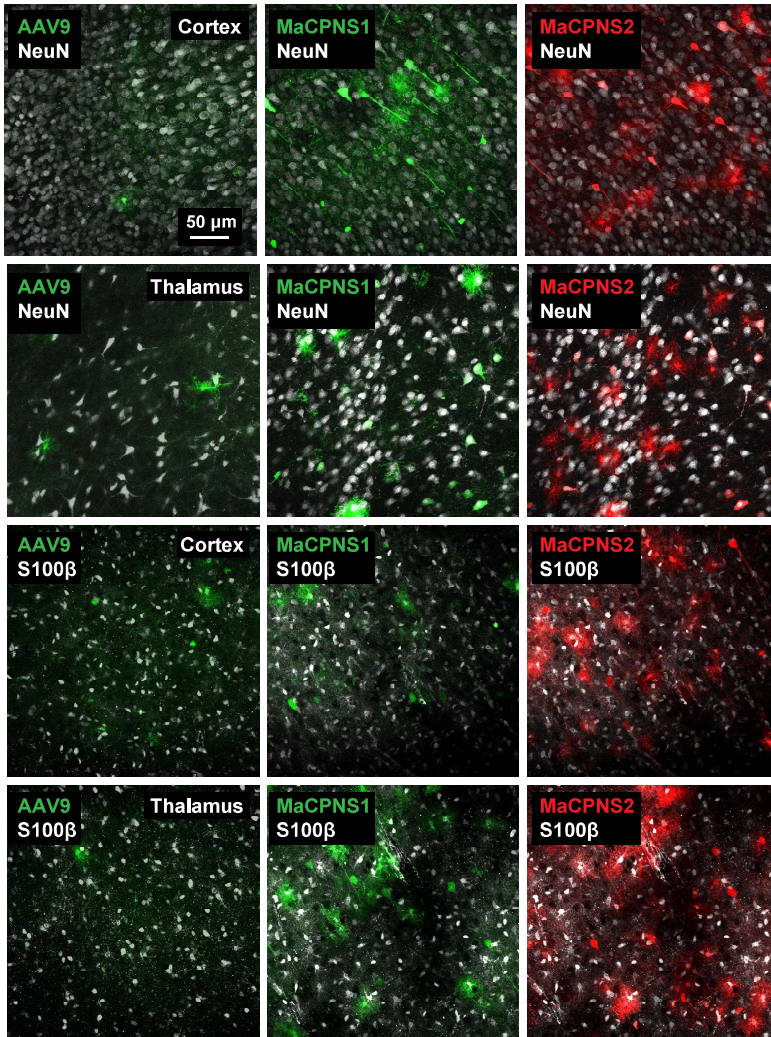

B.

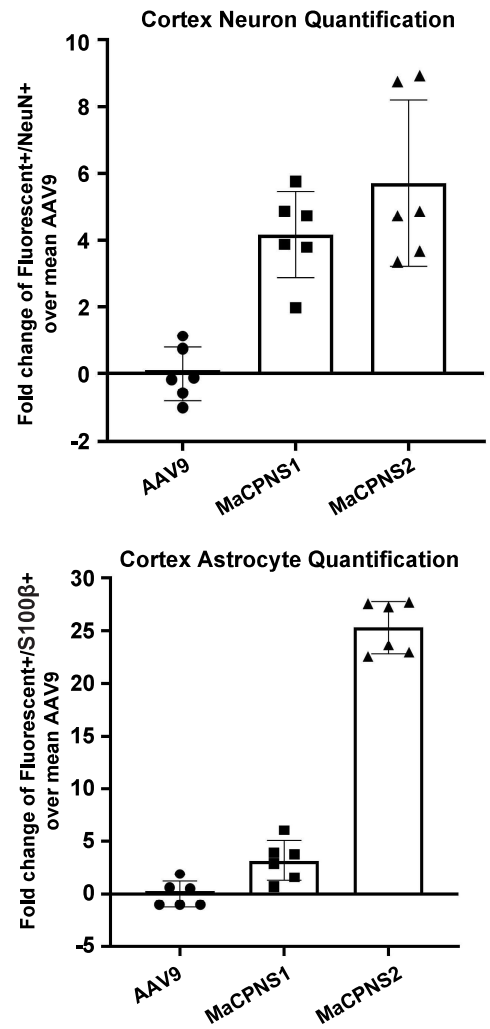

C.

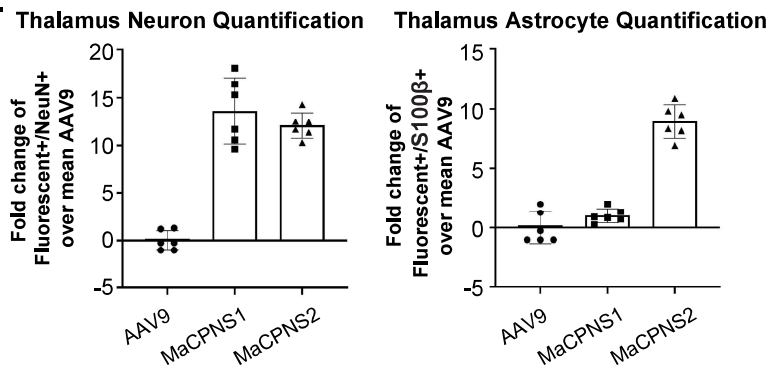

D.

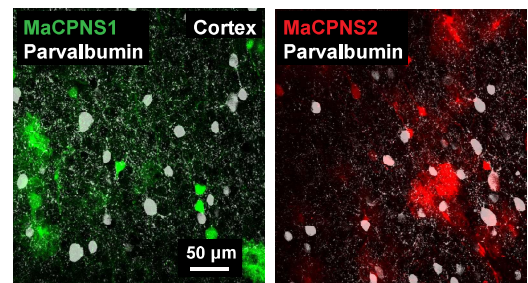

**Supplementary Figure 4. Cell-type profiles of engineered AAVs in marmoset brain. Related to Figure 5.**

**A.** Representative images of AAV9, MaCPNS1 and MaCPNS2 vector-mediated fluorescent protein expression in the marmoset cortex and thalamus (scale bar: 50  $\mu$ m). Slices were co-stained with NeuN (top 2 rows, white) or S100 $\beta$  (bottom 2 rows, white). **B, C.** Quantification of the fold change of Fluorescent+/marker over mean AAV9 in cortex and thalamus. Each data point is a slice. **D.** Representative images of MaCPNS1 and MaCPNS2 vector-mediated fluorescent protein expression in the marmoset cortex (scale bar: 50  $\mu$ m). Slices were co-stained with Parvalbumin (white).



Supplementary Figure 5 : Engineered vectors transduce spinal cord and DRG in macaque efficiently

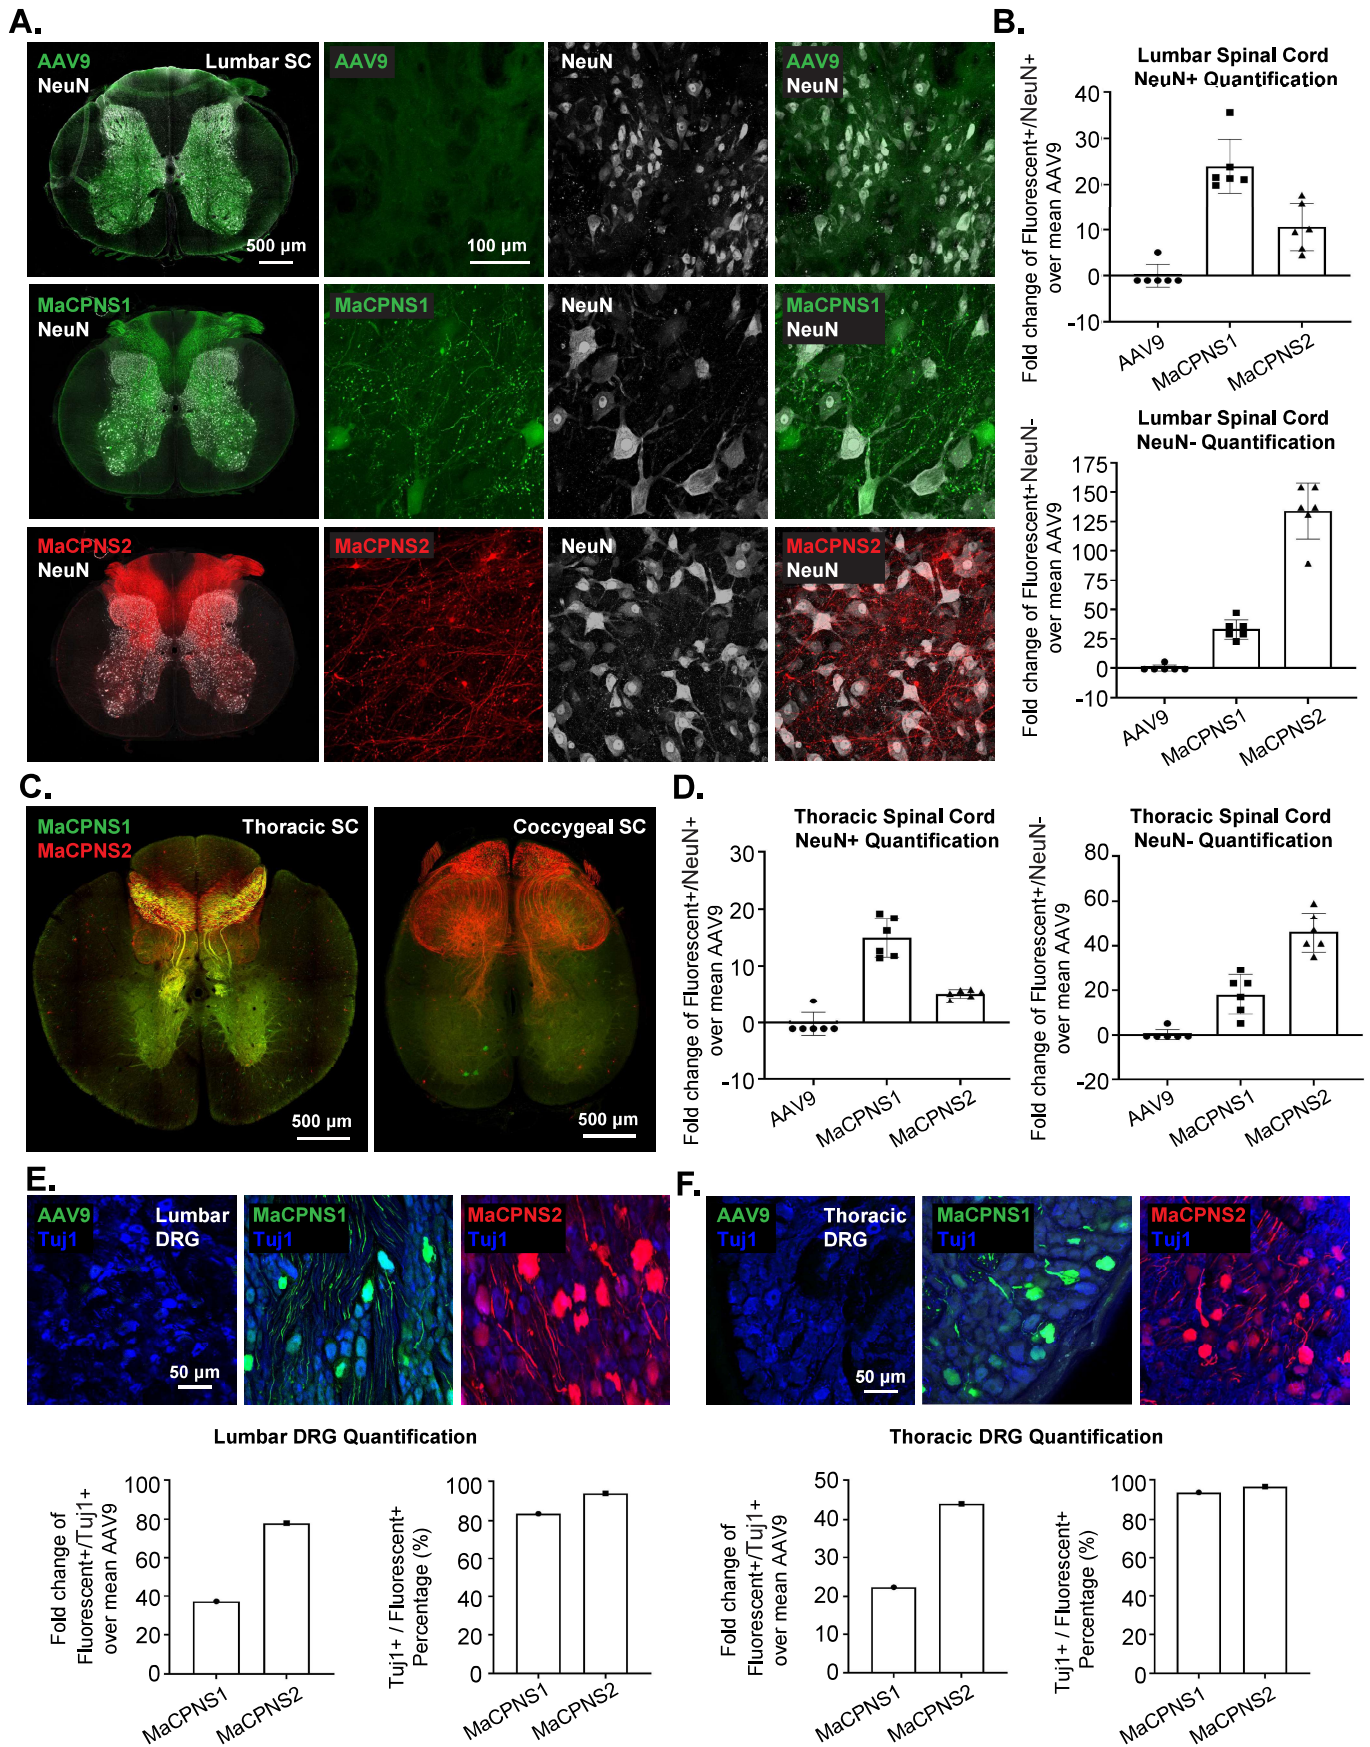

**Supplementary Figure 5. Engineered vectors transduce spinal cord and DRG in macaque efficiently. Related to Figure 6.**

**A.** Representative images of AAV9, MaCPNS1 and MaCPNS2 vector-mediated fluorescent protein expression in the macaque lumbar spinal cord (scale bar: 500  $\mu\text{m}$ ) with zoomed-in views of each channel (scale bar: 100  $\mu\text{m}$ ). Slices were co-stained with NeuN (white). **B.** Quantification of the fold change of Fluorescent+/marker over mean AAV9 in lumbar spinal cord. Each data point is a slice. **C.** Representative images of MaCPNS1 and MaCPNS2 vector-mediated fluorescent protein expression in the macaque thoracic spinal cord and coccygeal spinal cord (scale bar: 500  $\mu\text{m}$ ). **D.** Quantification of the fold change of Fluorescent+/marker over mean AAV9 in thoracic spinal cord. Each data point is a slice. **E, F.** (Top Panel) Representative images of AAV9, MaCPNS1 and MaCPNS2 vector-mediated fluorescent protein expression in the macaque lumbar DRG and thoracic DRG (scale bars: 50  $\mu\text{m}$ ). Slices were co-stained with Tuj1 (blue). (Bottom Panel) Quantification of the fold change of Fluorescent+/marker over mean AAV9 in DRGs and percentage of Tuj1+ within the fluorescent+ population. Each data point is a slice.

Supplementary Figure 6: Novel variants efficiently transduce macaque CNS while maintaining similar transduction in liver comparing to AAV9

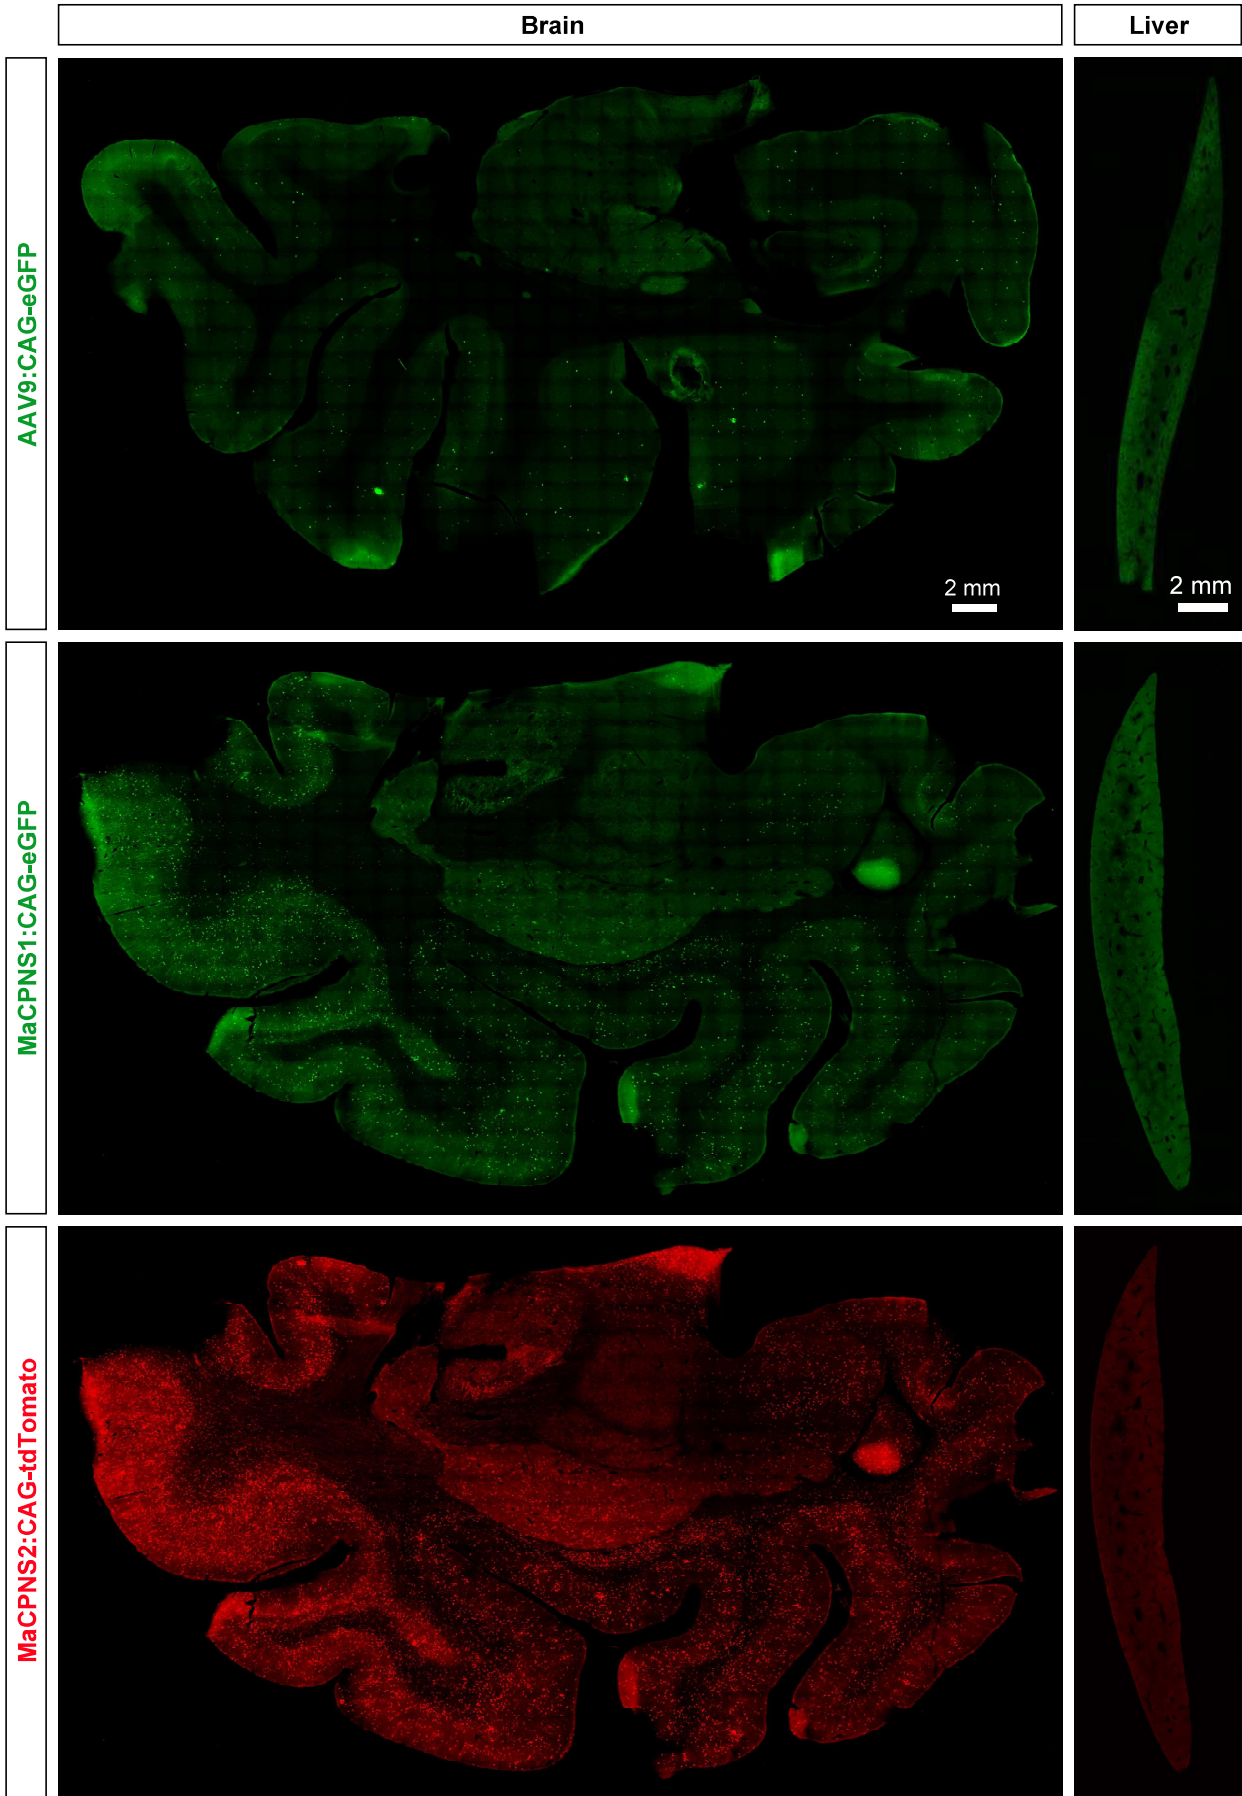

**Supplementary Figure 6. Novel variants efficiently transduce macaque CNS while maintaining similar transduction in liver compared to AAV9. Related to Figure 6.**

AAV capsids (AAV9/MaCPNS1/MaCPNS2) and their corresponding genomes (ssAAV:CAG-eGFP/tdTomato) were delivered to macaque to study transduction across the CNS and PNS after 3 weeks of expression. Two AAVs packaged with different fluorescent proteins were mixed and intravenously injected at a dose of  $5 \times 10^{13}$  vg/kg per macaque (*Macaca mulatta*, female, injected within 10 days of birth,  $2.5 \times 10^{13}$  vg/kg per AAV). Representative images of the brain (left) and liver (right) are shown (scale bars: 2 mm).

Supplementary Figure 7 : Cell-type profiles of engineered AAVs in macaque brain

A.

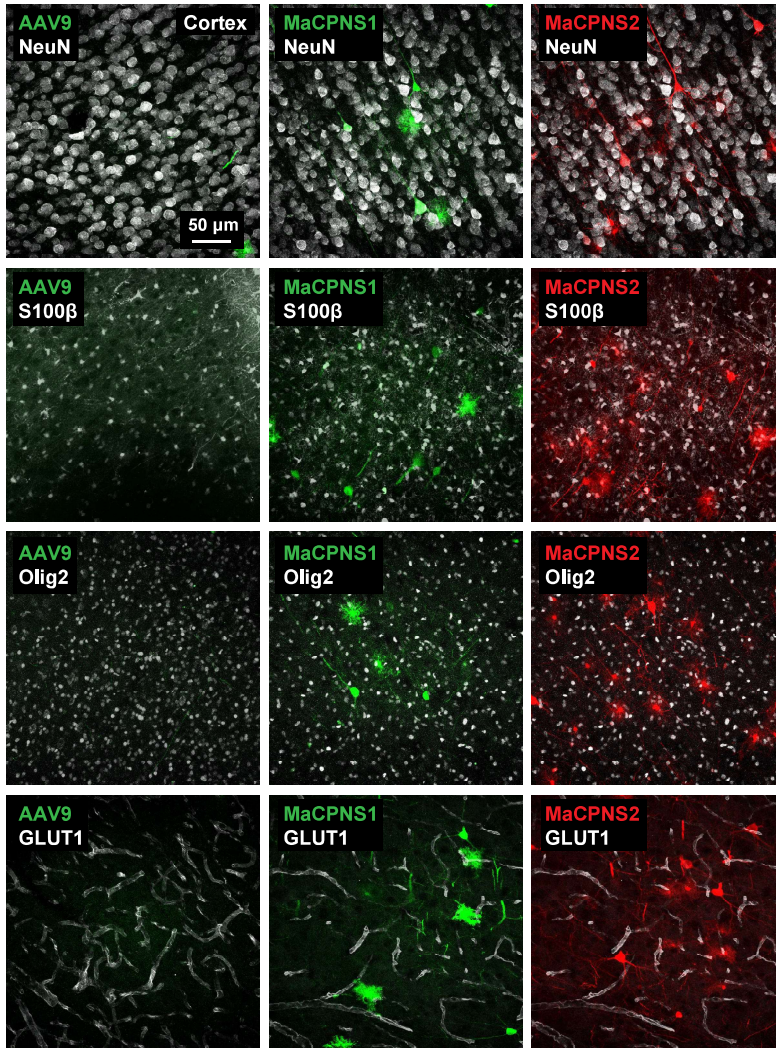

B.

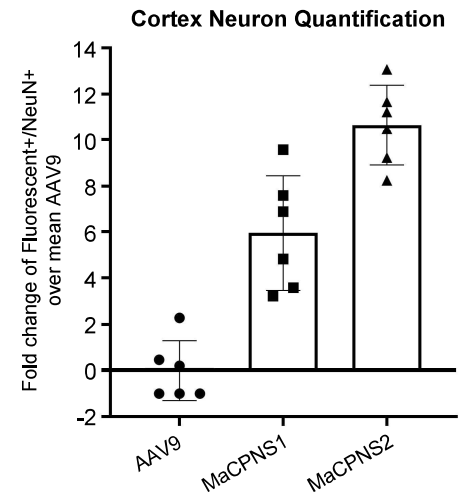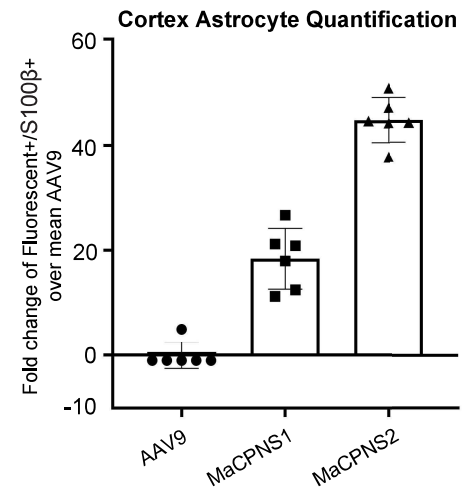

C.

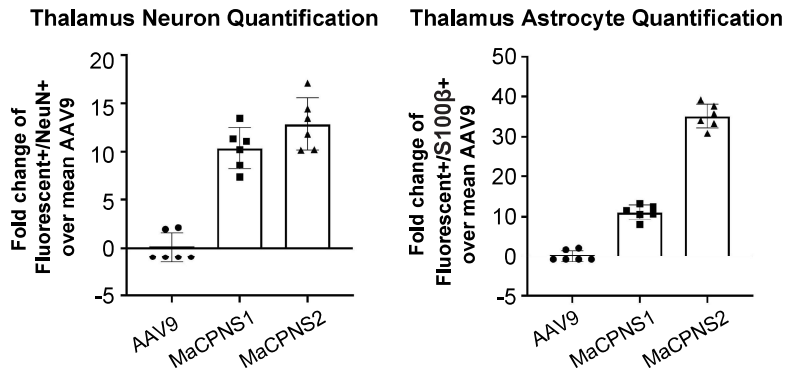

D.

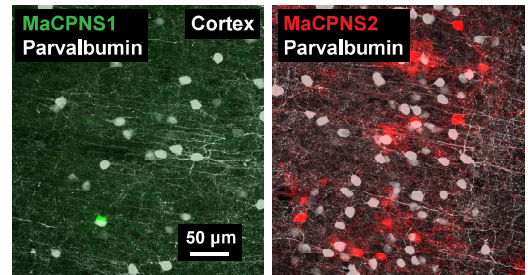

**Supplementary Figure 7. Cell-type profiles of engineered AAVs in macaque brain. Related to Figure 6.**

**A.** Representative images of AAV9, MaCPNS1 and MaCPNS2 vector-mediated fluorescent protein expression in the macaque cortex and thalamus (scale bar: 50  $\mu\text{m}$ ). Slices were co-stained with NeuN (first row, white), S100 $\beta$  (second row), Olig2 (third row) or GLUT1 (fourth row). **B, C.** Quantification of the fold change of Fluorescent+/marker over mean AAV9 in cortex and thalamus. Each data point is a slice. **D.** Representative images of MaCPNS1 and MaCPNS2 vector-mediated fluorescent protein expression in the macaque cortex (scale bar: 50  $\mu\text{m}$ ). Slices were co-stained with Parvalbumin (white).

Table S1. Main features of novel AAVs across species following systemic delivery.

|                | <b>Mouse</b>                                                                                                                                                                        | <b>Rat</b>                                                                                                                                                                                                                                                                                                                                                              | <b>Marmoset</b>                                                                                                                                                                                                                                    | <b>Macaque</b>                                                                                                                                                                                                                                                                                                               |
|----------------|-------------------------------------------------------------------------------------------------------------------------------------------------------------------------------------|-------------------------------------------------------------------------------------------------------------------------------------------------------------------------------------------------------------------------------------------------------------------------------------------------------------------------------------------------------------------------|----------------------------------------------------------------------------------------------------------------------------------------------------------------------------------------------------------------------------------------------------|------------------------------------------------------------------------------------------------------------------------------------------------------------------------------------------------------------------------------------------------------------------------------------------------------------------------------|
| <b>MaCPNS1</b> | <ul style="list-style-type: none"> <li>• efficient transduction of sensory ganglia (NG/DRG)</li> <li>• demonstrated functional readout and modulation of sensory ganglia</li> </ul> | <ul style="list-style-type: none"> <li>• transduction of sensory ganglia (DRG/TG), sympathetic chain ganglia, mixed sympathetic-parasympathetic ganglia and enteric ganglia across SI and LI</li> <li>• transduction of sensory nerve fibers entering SC and ascending afferent tracts in dorsal column</li> <li>• observed labeling of neurons across brain</li> </ul> | <ul style="list-style-type: none"> <li>• enhanced transduction of DRG, SI and ascending fiber tracts in dorsal column of the SC</li> <li>• robust transduction of neurons and astrocytes</li> <li>• more biased to neurons in the brain</li> </ul> | <ul style="list-style-type: none"> <li>• enhanced transduction of DRG</li> <li>• transduction of sensory nerve fibers entering SC and ascending afferent tracts in dorsal column</li> <li>• robust transduction of neurons and non-neuronal cells in brain and SC</li> <li>• more biased to neurons</li> </ul>               |
| <b>MaCPNS2</b> | <ul style="list-style-type: none"> <li>• efficient transduction of sensory ganglia (NG/DRG)</li> <li>• efficient transduction of ENS, especially SI</li> </ul>                      | <ul style="list-style-type: none"> <li>• transduction of sensory ganglia (DRG/TG), sympathetic chain ganglia, mixed sympathetic-parasympathetic ganglia and enteric ganglia across SI and LI</li> <li>• transduction of sensory nerve fibers entering SC and ascending afferent tracts in dorsal column</li> <li>• observed labeling of neurons across brain</li> </ul> | <ul style="list-style-type: none"> <li>• enhanced transduction of DRG, SI and ascending fiber tracts in dorsal column of the SC</li> <li>• robust transduction of neurons and astrocytes in the brain</li> </ul>                                   | <ul style="list-style-type: none"> <li>• enhanced transduction of DRG and GI tract, including esophagus, colon and SI</li> <li>• transduction of sensory nerve fibers entering SC and ascending afferent tracts in dorsal column</li> <li>• robust transduction of neurons and non-neuronal cells in brain and SC</li> </ul> |

NG: nodose ganglia; DRG: dorsal root ganglia; SI: small intestine; LI: large intestine; SC: spinal cord.

**Table S1. Main features of novel AAVs across species following systemic delivery, related to Figure 6.**
